# Supplementary material for: Factors influencing intention to obtain the HPV vaccine in South East Asian and Western Pacific regions: A systematic review and meta-analysis
Source: PubMed Central journal article supplement (PMC5832144; doi:10.1038/s41598-018-21912-x), 2018-02-26
Supplement: 41598_2018_21912_MOESM1_ESM.pdf [file 41598_2018_21912_MOESM1_ESM.pdf]

## Appendix 1: Search strategy

|                                                  |                                                                                                                                                                                                                                                                                                                                                                                                                                                                                                                                                                                                                                                                                                                                       |
|--------------------------------------------------|---------------------------------------------------------------------------------------------------------------------------------------------------------------------------------------------------------------------------------------------------------------------------------------------------------------------------------------------------------------------------------------------------------------------------------------------------------------------------------------------------------------------------------------------------------------------------------------------------------------------------------------------------------------------------------------------------------------------------------------|
| <b>PubMed</b><br>Total results=672               | (("papillomavirus infections"[MeSH Terms] AND "female"[MeSH Terms]) AND "papillomavirus vaccines"[MeSH Terms]) AND "health knowledge, attitudes, practice"[MeSH Terms]                                                                                                                                                                                                                                                                                                                                                                                                                                                                                                                                                                |
| <b>Embase</b><br>Total results=4, 627            | (human papillomavirus and vaccination and female).mp. [mp=title, abstract, heading word, drug trade name, original title, device manufacturer, drug manufacturer, device trade name, keyword, floating subheading]                                                                                                                                                                                                                                                                                                                                                                                                                                                                                                                    |
| <b>PsycINFO</b><br>Total results=119             | (human papillomavirus and vaccination and female).mp. [mp=title, abstract, heading word, table of contents, key concepts, original title, tests & measures]                                                                                                                                                                                                                                                                                                                                                                                                                                                                                                                                                                           |
| <b>Cochrane</b><br>Total results=13              | "human papilloma virus":ti,ab,kw and "female":ti,ab,kw and "vaccination":ti,ab,kw (Word variations have been searched)                                                                                                                                                                                                                                                                                                                                                                                                                                                                                                                                                                                                                |
| <b>MEDLINE [EBSCO HOST]</b><br>Total results=312 | S1: TX human papillomavirus AND TX female AND TX vaccination<br>S2: TX human papillomavirus AND TX female AND TX vaccination<br><b>Narrow by SubjectGeographic:</b> - republic of korea<br><b>Narrow by SubjectGeographic:</b> - asia<br><b>Narrow by SubjectGeographic:</b> - malaysia<br><b>Narrow by SubjectGeographic:</b> - taiwan<br><b>Narrow by SubjectGeographic:</b> - thailand<br><b>Narrow by SubjectGeographic:</b> - hong kong<br><b>Narrow by SubjectGeographic:</b> - vietnam<br><b>Narrow by SubjectGeographic:</b> - japan<br><b>Narrow by SubjectGeographic:</b> - india<br><b>Narrow by SubjectGeographic:</b> - china<br><b>Narrow by SubjectGeographic:</b> - australia<br><b>Search modes</b> - Boolean/Phrase |
| <b>CINAHL Plus</b><br>Total results=53           | human papillomavirus AND vaccination AND female<br><b>Narrow by SubjectGeographic:</b> - asia<br><b>Narrow by SubjectGeographic:</b> - australia & new zealand<br><b>Search modes</b> - Boolean/Phrase                                                                                                                                                                                                                                                                                                                                                                                                                                                                                                                                |
