# Supplementary material for: Factors influencing intention to obtain the HPV vaccine in South East Asian and Western Pacific regions: A systematic review and meta-analysis
Source: PubMed Central journal article supplement (PMC5832144; doi:10.1038/s41598-018-21912-x), 2018-02-26
Supplement: 41598_2018_21912_MOESM3_ESM.pdf [file 41598_2018_21912_MOESM3_ESM.pdf]

**Supplementary table S3: Quality assessment of included studies.**

| Study                                              | Selection                        |               | Non-respondents                                    | Ascertainment of exposure      | Comparability                                                       | Outcome                   |                                                               | NOS scale |
|----------------------------------------------------|----------------------------------|---------------|----------------------------------------------------|--------------------------------|---------------------------------------------------------------------|---------------------------|---------------------------------------------------------------|-----------|
|                                                    | Representativeness of the sample | Sample size   |                                                    |                                |                                                                     | Assessment of the outcome | Statistical test                                              |           |
| Charakorn C <i>et al.</i> , 2011 <sup>23</sup>     | Selected group of users          | Not justified | Comparability with non-respondents not established | Validated measurement tool*    | Controls for the most important factor* and any additional factors* | Self –report*             | Clearly described and association was measured appropriately* | 5         |
| Choi HCW <i>et al.</i> , 2013 <sup>11</sup>        | Somewhat representative*         | Not justified | Comparability with non-respondents not established | Validated measurement tool*    | Controls for the most important factor* and any additional factors* | Self –report*             | Clearly described and association was measured appropriately* | 6         |
| Egawa-Takata T <i>et al.</i> , 2015 <sup>13</sup>  | Somewhat representative*         | Not justified | Comparability with non-respondents not established | Non-validated measurement tool | Controls for the most important factor* and any additional factors* | Self –report*             | Clearly described and association was measured appropriately* | 5         |
| Egawa-Takata T <i>et al.</i> , 2016 <sup>12</sup>  | Selected group of users          | Not justified | Comparability with non-respondents not established | Non-validated measurement tool | Not investigated                                                    | Self –report*             | Incomplete                                                    | 1         |
| Gu C <i>et al.</i> , 2015 <sup>8</sup>             | Somewhat representative*         | Not justified | Comparability with non-respondents is established* | Validated measurement tool*    | Controls for the most important factor* and any additional factors* | Self –report*             | Clearly described and association was measured appropriately* | 7         |
| Hsu YY <i>et al.</i> , 2009 <sup>16</sup>          | Somewhat representative*         | Not justified | Comparability with non-respondents is established* | Validated measurement tool*    | Controls for the most important factor* and any additional factors* | Self –report*             | Clearly described and association was measured appropriately* | 7         |
| Johnson DC <i>et al.</i> , 2014 <sup>22</sup>      | Somewhat representative*         | Not justified | Comparability with non-respondents not established | Validated measurement tool*    | Controls for the most important factor* and any additional factors* | Self –report*             | Clearly described and association was measured appropriately* | 6         |
| Juntasopeepun P <i>et al.</i> , 2012 <sup>24</sup> | Somewhat representative*         | Not justified | Comparability with non-respondents is established* | Validated measurement tool*    | Controls for the most important factor* and any additional factors* | Self –report*             | Clearly described and association was measured appropriately* | 7         |

|                                                   |                          |               |                                                    |                                |                                                                     |               |                                                               |   |
|---------------------------------------------------|--------------------------|---------------|----------------------------------------------------|--------------------------------|---------------------------------------------------------------------|---------------|---------------------------------------------------------------|---|
| Kang HS <i>et al.</i> , 2009 <sup>14</sup>        | Somewhat representative* | Justified*    | Comparability with non-respondents not established | Validated measurement tool*    | any additional factors*<br>Not investigated                         | Self –report* | Clearly described and association was measured appropriately* | 5 |
| Kang HY <i>et al.</i> , 2011 <sup>15</sup>        | Somewhat representative* | Justified*    | Comparability with non-respondents is established* | Validated measurement tool*    | Not investigated                                                    | Self –report* | Clearly described and association was measured appropriately* | 6 |
| Kruiroongroj S <i>et al.</i> , 2014 <sup>25</sup> | Somewhat representative* | Not justified | Comparability with non-respondents not established | Non-validated measurement tool | Not investigated                                                    | Self –report* | Clearly described and association was measured appropriately* | 3 |
| Li J <i>et al.</i> , 2009 <sup>9</sup>            | Somewhat representative* | Justified*    | Comparability with non-respondents is established* | Non-validated measurement tool | Controls for the most important factor* and any additional factors* | Self –report* | Clearly described and association was measured appropriately* | 7 |
| Montgomery MP <i>et al.</i> , 2015 <sup>21</sup>  | Somewhat representative* | Not justified | Comparability with non-respondents not established | Non-validated measurement tool | Controls for the most important factor* and any additional factors* | Self –report* | Clearly described and association was measured appropriately* | 5 |
| Sam IC <i>et al.</i> , 2008 <sup>19</sup>         | Somewhat representative* | Not justified | Comparability with non-respondents not established | Non-validated measurement tool | Controls for the most important factor* and any additional factors* | Self –report* | Clearly described and association was measured appropriately* | 5 |
| Wong LP, 2010 <sup>20</sup>                       | Somewhat representative* | Not justified | Comparability with non-respondents not established | Validated measurement tool*    | Not investigated                                                    | Self –report* | Clearly described and association was measured appropriately* | 4 |
| Yen CF <i>et al.</i> , 2011 <sup>17</sup>         | Selected group of users  | Not justified | Comparability with non-respondents not established | Non-validated measurement tool | Controls for the most important factor* and any additional factors* | Self –report* | Clearly described and association was measured appropriately* | 4 |
| Young AM <i>et al.</i> , 2010 <sup>26</sup>       | Somewhat representative* | Not justified | Comparability with non-respondents not established | Non-validated measurement tool | Controls for any additional factor.*                                | Self –report* | Clearly described and association was measured appropriately* | 4 |
| Yu Y <i>et al.</i> , 2016 <sup>10</sup>           | Somewhat representative* | Not justified | Comparability with non-respondents not established | Non-validated measurement tool | Controls for the most important factor* and any additional factors* | Self –report* | Clearly described and association was measured appropriately* | 5 |

|                                              |                          |               |                                                    |                             |                                                                     |               |                                                               |   |
|----------------------------------------------|--------------------------|---------------|----------------------------------------------------|-----------------------------|---------------------------------------------------------------------|---------------|---------------------------------------------------------------|---|
| Zhuang QY <i>et al.</i> , 2016 <sup>18</sup> | Somewhat representative* | Not justified | Comparability with non-respondents not established | Validated measurement tool* | Controls for the most important factor* and any additional factors* | Self –report* | Clearly described and association was measured appropriately* | 6 |
|----------------------------------------------|--------------------------|---------------|----------------------------------------------------|-----------------------------|---------------------------------------------------------------------|---------------|---------------------------------------------------------------|---|

---
